# Supplementary material for: Urinary Metals and Heart Rate Variability: A Cross-Sectional Study of Urban Adults in Wuhan, China
Source: PubMed Central journal article supplement (PMC4348740; doi:10.1289/ehp.1307563), 2014-10-30

**Supplemental Material**

**Urinary Metals and Heart Rate Variability: A Cross-Sectional  
Study of Urban Adults in Wuhan, China**

Wei Feng, Xiaosheng He, Mu Chen, Siyun Deng, Gaokun Qiu, Xiaoliang Li, Chuanyao Liu, Jun  
Li, Qifei Deng, Suli Huang, Tian Wang, Xiayun Dai, Binyao Yang, Jing Yuan, Meian He,  
Xiaomin Zhang, Weihong Chen, Haidong Kan, and Tangchun Wu

**Table S1.** Basic characteristics and HRV indices of original cohort population and source population in Wuhan city.

| <b>Variable (unit)</b>               | <b>Original cohort population<br/>(n=3053)</b> | <b>Source population<br/>(n=2004)</b> | <b>P</b> |
|--------------------------------------|------------------------------------------------|---------------------------------------|----------|
| Age (year)                           | 53.75 (28.67-74.86)                            | 51.83 (26.83-72.86)                   | < 0.001  |
| Gender: male/female (%)              | 35.6/64.6                                      | 36.2/63.8                             | 0.593    |
| Body mass index (kg/m <sup>2</sup> ) | 23.92 (19.05-30.12)                            | 23.85 (19.00-29.94)                   | 0.801    |
| Smokers: never/former/current (%)    | 74.7/5.7/19.6                                  | 74.3/5.2/20.5                         | 0.590    |
| Pack years, mean ± SD                | 26.80 ± 22.81                                  | 26.48 ± 22.67                         | 0.795    |
| HRV indices                          |                                                |                                       |          |
| SDNN (msec)                          | 34.60 (18.90-63.38)                            | 35.00 (18.90-63.13)                   | 0.320    |
| r-MSSD (msec)                        | 22.50 (13.20-46.88)                            | 22.65 (13.20-46.10)                   | 0.626    |
| Low frequency (ms <sup>2</sup> )     | 219.12 (39.85-1134.55)                         | 232.57 (43.11-1137.06)                | 0.086    |
| High frequency (ms <sup>2</sup> )    | 125.93 (22.26-801.44)                          | 127.85 (24.34-781.73)                 | 0.513    |
| Total power (ms <sup>2</sup> )       | 819.36 (204.86-3250.73)                        | 855.04 (208.21-3109.79)               | 0.168    |

Abbreviations: SDNN, standard deviation of the normal-to-normal intervals; r-MSSD, square root of the mean squared difference between adjacent normal-to-normal intervals. Data were presented as median (5–95% percentiles). Chi-square test and Mann Whitney U test were performed for comparison of the categorical and continuous variables respectively.

**Table S2.** The distributions of urinary metals in the community-dwelling population (n=2004).

| Urinary metals                                              | Geometric mean | Percentile 5th | Percentile 25th | Percentile 50th | Percentile 75th | Percentile 95th | N (%) < LOQ |
|-------------------------------------------------------------|----------------|----------------|-----------------|-----------------|-----------------|-----------------|-------------|
| <b>Unstandardized for urinary creatinine (µg/L)</b>         |                |                |                 |                 |                 |                 |             |
| Aluminium                                                   | 33.80          | 12.77          | 21.99           | 32.02           | 49.15           | 113.05          | 0 (0.00)    |
| Titanium                                                    | 41.96          | 10.68          | 25.23           | 44.42           | 73.53           | 140.60          | 0 (0.00)    |
| Vanadium                                                    | 0.51           | 0.19           | 0.35            | 0.50            | 0.75            | 1.34            | 0 (0.00)    |
| Chromium                                                    | 1.45           | 0.50           | 0.93            | 1.46            | 2.24            | 4.35            | 3 (0.15)    |
| Manganese                                                   | 2.56           | 0.88           | 1.67            | 2.53            | 3.84            | 7.66            | 0 (0.00)    |
| Iron                                                        | 85.27          | 22.48          | 46.53           | 80.08           | 146.72          | 378.07          | 0 (0.00)    |
| Cobalt                                                      | 0.27           | 0.08           | 0.16            | 0.25            | 0.43            | 1.28            | 2 (0.10)    |
| Nickel                                                      | 2.36           | 0.76           | 1.50            | 2.35            | 3.65            | 7.90            | 5 (0.25)    |
| Copper                                                      | 7.70           | 2.85           | 5.26            | 7.59            | 11.23           | 20.62           | 0 (0.00)    |
| Zinc                                                        | 276.94         | 84.09          | 171.15          | 278.92          | 446.40          | 912.32          | 0 (0.00)    |
| Arsenic                                                     | 28.02          | 6.50           | 17.25           | 29.51           | 48.50           | 92.37           | 0 (0.00)    |
| Selenium                                                    | 7.28           | 1.93           | 4.51            | 7.65            | 12.19           | 23.54           | 0 (0.00)    |
| Rubidium                                                    | 1856.88        | 431.25         | 1212.60         | 2067.03         | 3191.14         | 5236.96         | 0 (0.00)    |
| Strontium                                                   | 117.35         | 35.10          | 76.79           | 125.40          | 186.47          | 319.81          | 0 (0.00)    |
| Molybdenum                                                  | 45.37          | 10.49          | 27.35           | 47.46           | 80.51           | 159.89          | 0 (0.00)    |
| Cadmium                                                     | 0.87           | 0.23           | 0.53            | 0.91            | 1.48            | 2.97            | 0 (0.00)    |
| Tin                                                         | 0.25           | < LOQ          | < LOQ           | 0.28            | 0.41            | 0.76            | 744 (37.13) |
| Antimony                                                    | 0.16           | 0.06           | 0.11            | 0.16            | 0.24            | 0.42            | 0 (0.00)    |
| Barium                                                      | 4.01           | 1.53           | 2.64            | 3.91            | 5.92            | 11.29           | 0 (0.00)    |
| Tungsten                                                    | 0.12           | 0.03           | 0.07            | 0.12            | 0.22            | 0.75            | 43 (2.15)   |
| Thallium                                                    | 0.52           | 0.13           | 0.34            | 0.57            | 0.89            | 1.52            | 0 (0.00)    |
| Lead                                                        | 3.08           | 0.45           | 2.19            | 3.31            | 4.67            | 8.94            | 108 (5.39)  |
| Uranium                                                     | 0.03           | 0.01           | 0.02            | 0.03            | 0.05            | 0.08            | 9 (0.45)    |
| <b>Urinary creatinine-standardized (µg/mmol creatinine)</b> |                |                |                 |                 |                 |                 |             |
| Aluminium                                                   | 2.90           | 0.90           | 1.65            | 2.63            | 4.61            | 13.74           | 0 (0.00)    |
| Titanium                                                    | 3.60           | 1.07           | 2.16            | 3.74            | 6.11            | 10.57           | 0 (0.00)    |
| Vanadium                                                    | 0.04           | 0.02           | 0.03            | 0.04            | 0.07            | 0.13            | 0 (0.00)    |
| Chromium                                                    | 0.12           | 0.04           | 0.07            | 0.12            | 0.21            | 0.49            | 3 (0.15)    |
| Manganese                                                   | 0.22           | 0.06           | 0.13            | 0.21            | 0.36            | 0.96            | 0 (0.00)    |
| Iron                                                        | 7.31           | 1.78           | 3.75            | 6.76            | 13.10           | 38.09           | 0 (0.00)    |
| Cobalt                                                      | 0.02           | 0.01           | 0.01            | 0.02            | 0.04            | 0.11            | 2 (0.10)    |
| Nickel                                                      | 0.20           | 0.07           | 0.12            | 0.19            | 0.32            | 0.72            | 5 (0.25)    |
| Copper                                                      | 0.66           | 0.28           | 0.44            | 0.62            | 0.91            | 1.85            | 0 (0.00)    |
| Zinc                                                        | 23.75          | 8.70           | 16.24           | 23.43           | 35.23           | 64.32           | 0 (0.00)    |
| Arsenic                                                     | 2.40           | 0.89           | 1.68            | 2.42            | 3.45            | 6.43            | 0 (0.00)    |
| Selenium                                                    | 0.62           | 0.25           | 0.43            | 0.62            | 0.91            | 1.50            | 0 (0.00)    |
| Rubidium                                                    | 159.24         | 61.70          | 114.27          | 164.71          | 230.54          | 358.77          | 0 (0.00)    |
| Strontium                                                   | 10.06          | 3.26           | 6.66            | 10.55           | 15.63           | 28.35           | 0 (0.00)    |
| Molybdenum                                                  | 3.89           | 1.29           | 2.58            | 3.99            | 5.95            | 10.87           | 0 (0.00)    |
| Cadmium                                                     | 0.08           | 0.03           | 0.05            | 0.08            | 0.11            | 0.22            | 0 (0.00)    |
| Tin                                                         | 0.02           | < LOQ          | < LOQ           | 0.02            | 0.03            | 0.08            | 744 (37.13) |
| Antimony                                                    | 0.01           | 0.01           | 0.01            | 0.01            | 0.02            | 0.04            | 0 (0.00)    |
| Barium                                                      | 0.34           | 0.11           | 0.20            | 0.33            | 0.56            | 1.37            | 0 (0.00)    |
| Tungsten                                                    | 0.01           | 0.00           | 0.01            | 0.01            | 0.02            | 0.06            | 43 (2.15)   |
| Thallium                                                    | 0.05           | 0.02           | 0.03            | 0.05            | 0.07            | 0.12            | 0 (0.00)    |
| Lead                                                        | 0.26           | 0.08           | 0.18            | 0.26            | 0.41            | 0.87            | 108 (5.39)  |
| Uranium                                                     | 0.00           | 0.00           | 0.00            | 0.00            | 0.00            | 0.01            | 9 (0.45)    |

Abbreviations: LOQ, limits of quantification.

**Table S3.** Associations between urinary metals (Spearman's rank correlation coefficients, all  $p < 0.001$ ).

|    | Al   | Ti   | V    | Cr   | Mn   | Fe   | Co   | Ni   | Cu   | Zn   | As   | Se   | Rb   | Sr   | Mo   | Cd   | Sn   | Sb   | Ba   | W    | Tl   | Pb   | U    |
|----|------|------|------|------|------|------|------|------|------|------|------|------|------|------|------|------|------|------|------|------|------|------|------|
| Al | 1.00 | 0.19 | 0.29 | 0.34 | 0.69 | 0.34 | 0.25 | 0.27 | 0.29 | 0.25 | 0.14 | 0.19 | 0.16 | 0.20 | 0.15 | 0.21 | 0.37 | 0.37 | 0.51 | 0.31 | 0.19 | 0.46 | 0.42 |
| Ti |      | 1.00 | 0.65 | 0.52 | 0.09 | 0.10 | 0.36 | 0.34 | 0.29 | 0.30 | 0.46 | 0.70 | 0.50 | 0.37 | 0.39 | 0.40 | 0.44 | 0.36 | 0.14 | 0.27 | 0.48 | 0.36 | 0.24 |
| V  |      |      | 1.00 | 0.79 | 0.28 | 0.23 | 0.38 | 0.39 | 0.45 | 0.33 | 0.45 | 0.58 | 0.49 | 0.39 | 0.42 | 0.38 | 0.45 | 0.46 | 0.31 | 0.34 | 0.49 | 0.48 | 0.37 |
| Cr |      |      |      | 1.00 | 0.34 | 0.23 | 0.26 | 0.35 | 0.36 | 0.20 | 0.23 | 0.37 | 0.27 | 0.21 | 0.20 | 0.21 | 0.37 | 0.28 | 0.32 | 0.21 | 0.31 | 0.41 | 0.26 |
| Mn |      |      |      |      | 1.00 | 0.70 | 0.32 | 0.30 | 0.34 | 0.32 | 0.20 | 0.16 | 0.19 | 0.17 | 0.19 | 0.22 | 0.35 | 0.38 | 0.46 | 0.28 | 0.17 | 0.44 | 0.35 |
| Fe |      |      |      |      |      | 1.00 | 0.32 | 0.23 | 0.30 | 0.34 | 0.29 | 0.23 | 0.26 | 0.17 | 0.26 | 0.25 | 0.28 | 0.32 | 0.24 | 0.21 | 0.19 | 0.30 | 0.22 |
| Co |      |      |      |      |      |      | 1.00 | 0.58 | 0.43 | 0.41 | 0.52 | 0.50 | 0.52 | 0.41 | 0.52 | 0.54 | 0.41 | 0.49 | 0.21 | 0.36 | 0.50 | 0.40 | 0.25 |
| Ni |      |      |      |      |      |      |      | 1.00 | 0.54 | 0.45 | 0.45 | 0.44 | 0.40 | 0.30 | 0.45 | 0.46 | 0.34 | 0.50 | 0.23 | 0.32 | 0.33 | 0.39 | 0.32 |
| Cu |      |      |      |      |      |      |      |      | 1.00 | 0.58 | 0.54 | 0.46 | 0.47 | 0.32 | 0.49 | 0.54 | 0.37 | 0.58 | 0.30 | 0.36 | 0.40 | 0.45 | 0.48 |
| Zn |      |      |      |      |      |      |      |      |      | 1.00 | 0.59 | 0.57 | 0.51 | 0.40 | 0.54 | 0.53 | 0.37 | 0.56 | 0.22 | 0.38 | 0.41 | 0.43 | 0.39 |
| As |      |      |      |      |      |      |      |      |      |      | 1.00 | 0.77 | 0.76 | 0.55 | 0.74 | 0.64 | 0.44 | 0.66 | 0.16 | 0.43 | 0.61 | 0.41 | 0.42 |
| Se |      |      |      |      |      |      |      |      |      |      |      | 1.00 | 0.78 | 0.54 | 0.67 | 0.60 | 0.54 | 0.62 | 0.17 | 0.45 | 0.65 | 0.45 | 0.38 |
| Rb |      |      |      |      |      |      |      |      |      |      |      |      | 1.00 | 0.42 | 0.63 | 0.65 | 0.46 | 0.60 | 0.11 | 0.37 | 0.83 | 0.42 | 0.35 |
| Sr |      |      |      |      |      |      |      |      |      |      |      |      |      | 1.00 | 0.51 | 0.44 | 0.37 | 0.48 | 0.47 | 0.42 | 0.48 | 0.47 | 0.36 |
| Mo |      |      |      |      |      |      |      |      |      |      |      |      |      |      | 1.00 | 0.57 | 0.40 | 0.62 | 0.13 | 0.50 | 0.53 | 0.40 | 0.39 |
| Cd |      |      |      |      |      |      |      |      |      |      |      |      |      |      |      | 1.00 | 0.40 | 0.56 | 0.20 | 0.36 | 0.56 | 0.44 | 0.41 |
| Sn |      |      |      |      |      |      |      |      |      |      |      |      |      |      |      |      | 1.00 | 0.53 | 0.27 | 0.41 | 0.43 | 0.49 | 0.37 |
| Sb |      |      |      |      |      |      |      |      |      |      |      |      |      |      |      |      |      | 1.00 | 0.34 | 0.55 | 0.47 | 0.53 | 0.63 |
| Ba |      |      |      |      |      |      |      |      |      |      |      |      |      |      |      |      |      |      | 1.00 | 0.26 | 0.21 | 0.41 | 0.43 |
| W  |      |      |      |      |      |      |      |      |      |      |      |      |      |      |      |      |      |      |      | 1.00 | 0.36 | 0.41 | 0.44 |
| Tl |      |      |      |      |      |      |      |      |      |      |      |      |      |      |      |      |      |      |      |      | 1.00 | 0.47 | 0.30 |
| Pb |      |      |      |      |      |      |      |      |      |      |      |      |      |      |      |      |      |      |      |      |      | 1.00 | 0.40 |
| U  |      |      |      |      |      |      |      |      |      |      |      |      |      |      |      |      |      |      |      |      |      |      | 1.00 |

Abbreviations: Al, Aluminium; Ti, Titanium; V, Vanadium; Cr, Chromium; Mn, Manganese; Fe, Iron; Co, Cobalt; Ni, Nickel; Cu, Copper; Zn, Zinc; As, Arsenic; Se, Selenium; Rb, Rubidium; Sr, Strontium; Mo, Molybdenum; Cd, Cadmium; Sn, Tin; Sb, Antimony; Ba, Barium; W, Tungsten; Tl, Thallium; Pb, Lead; U, Uranium.

**Table S4.** Estimated percent difference in HRV parameters (95% CI) in association with a 10-fold increase in creatinine-standardized urine metal concentrations based on multiple-metal models.

| <b>Variable</b>       | <b><math>\beta</math> (95% CIs)</b> | <b><i>p</i></b> |
|-----------------------|-------------------------------------|-----------------|
| <b>SDNN</b>           |                                     |                 |
| Titanium              | 12.24 (5.50, 19.41)                 | < 0.001         |
| Selenium              | -9.73 (-18.07, -0.54)               | 0.038           |
| Rubidium              | 8.06 (-0.86, 17.79)                 | 0.078           |
| Strontium             | 5.44 (-0.62, 11.87)                 | 0.079           |
| Cadmium               | -7.88 (-14.12, -1.19)               | 0.022           |
| <b>r-MSSD</b>         |                                     |                 |
| Titanium              | 13.95 (5.96, 22.53)                 | < 0.001         |
| Selenium              | -8.67 (-16.87, 0.34)                | 0.059           |
| Strontium             | 7.18 (-0.31, 15.24)                 | 0.061           |
| Lead                  | -6.41 (-12.04, -0.43)               | 0.036           |
| <b>Low frequency</b>  |                                     |                 |
| Titanium              | 31.61 (14.37, 51.44)                | < 0.001         |
| Manganese             | 16.41 (2.28, 32.51)                 | 0.021           |
| Arsenic               | -21.24 (-35.07, -4.46)              | 0.015           |
| Rubidium              | 25.01 (-0.16, 56.53)                | 0.052           |
| Cadmium               | -18.61 (-32.45, -1.94)              | 0.030           |
| Lead                  | -13.49 (-25.66, 0.68)               | 0.061           |
| <b>High frequency</b> |                                     |                 |
| Titanium              | 28.46 (6.79, 54.53)                 | 0.008           |
| Vanadium              | 19.78 (-2.02, 46.44)                | 0.078           |
| Cadmium               | -21.11 (-34.76, -4.61)              | 0.014           |
| <b>Total power</b>    |                                     |                 |
| Aluminium             | 11.92 (-0.04, 25.32)                | 0.051           |
| Titanium              | 28.09 (14.02, 43.90)                | < 0.001         |
| Cadmium               | -13.45 (-24.98, -0.15)              | 0.048           |
| Lead                  | -11.14 (-21.79, 0.96)               | 0.070           |

Abbreviations: SDNN, standard deviation of the normal-to-normal intervals; r-MSSD, square root of the mean squared difference between adjacent normal-to-normal intervals.

Metals (natural log-transformed) were selected by backward elimination in multivariate linear regression models ( $\alpha = 0.10$ ) with adjustment for age, gender, smoking status, pack year, BMI, hypertension, hyperlipidemia and diabetes, respectively.

**Table S5.** Percent difference (95% CI) in HRV parameters according to age, gender and smoking status.

| Variable              | Age<br>(≤ 52 yrs, n=1003) | Age (> 52 yrs,<br>n=1001) | p for<br>interaction | Male<br>(n=725)         | Female<br>(n=1279)     | p for<br>interaction | Non-smokers<br>(n=1594)* | Current smokers<br>(n=410) | p for<br>interaction |
|-----------------------|---------------------------|---------------------------|----------------------|-------------------------|------------------------|----------------------|--------------------------|----------------------------|----------------------|
| <b>SDNN</b>           |                           |                           |                      |                         |                        |                      |                          |                            |                      |
| Titanium              | 2.49 (-4.05, 9.48)        | 9.93 (1.92, 18.56)        | 0.417                | 10.52 (1.38, 20.48)     | 5.11 (-0.96, 11.54)    | 0.233                | 6.67 (0.97, 12.69)       | 7.24 (-3.88, 19.64)        | 0.179                |
| Copper                | -5.40 (-13.69, 3.69)      | -11.61 (-19.68, -2.73)    | 0.518                | -7.52 (-17.76, 4.00)    | -9.00 (-15.84, -1.61)  | 0.854                | -8.70 (-14.96, -1.98)    | -10.04 (-23.25, 5.45)      | 0.101                |
| <b>r-MSSD</b>         |                           |                           |                      |                         |                        |                      |                          |                            |                      |
| Titanium              | 5.02 (-2.73, 13.39)       | 10.80 (0.88, 21.69)       | 0.363                | 12.49 (1.63, 24.51)     | 5.88 (-1.79, 14.16)    | 0.305                | 7.42 (0.21, 15.16)       | 9.24 (-3.16, 23.43)        | 0.542                |
| Cadmium               | -14.08 (-21.23, -6.27)    | 4.20 (-7.13, 16.92)       | 0.041                | -0.71 (-12.98, 13.29)   | -8.99 (-16.36, -0.97)  | 0.273                | -5.63 (-12.81, 2.14)     | -10.88 (-23.89, 4.36)      | 0.074                |
| Lead                  | -0.45 (-7.97, 7.67)       | -16.48 (-24.23, -7.95)    | 0.146                | -12.36 (-21.38, -2.31)  | -5.90 (-12.82, 1.57)   | 0.665                | -7.30 (-13.49, -0.67)    | -14.08 (-25.89, -0.40)     | 0.888                |
| <b>Low frequency</b>  |                           |                           |                      |                         |                        |                      |                          |                            |                      |
| Titanium              | 15.08 (-4.88, 39.23)      | 37.55 (10.10, 71.83)      | 0.163                | 30.20 (3.37, 63.98)     | 22.43 (2.22, 46.64)    | 0.619                | 29.93 (10.24, 53.15)     | 11.83 (-15.52, 48.04)      | 0.460                |
| Arsenic               | -34.58 (-49.62, -15.04)   | -18.67 (-40.00, 10.22)    | 0.239                | -19.47 (-42.26, 12.32)  | -19.22 (-36.62, 2.96)  | 0.828                | -21.51 (-36.97, -2.27)   | -14.15 (-43.95, 31.47)     | 0.530                |
| Rubidium              | 48.25 (11.85, 96.49)      | 10.39 (-23.15, 58.56)     | 0.616                | 49.89 (3.38, 117.33)    | 8.55 (-17.27, 42.43)   | 0.640                | 13.06 (-11.69, 44.75)    | 61.35 (0.09, 160.10)       | 0.536                |
| Cadmium               | -32.18 (-46.37, -14.24)   | -8.11 (-32.30, 24.71)     | 0.024                | -38.45 (-55.84, -14.22) | -8.36 (-26.42, 14.13)  | 0.244                | -11.71 (-27.89, 8.11)    | -45.99 (-64.00, -18.97)    | 0.055                |
| <b>High frequency</b> |                           |                           |                      |                         |                        |                      |                          |                            |                      |
| Titanium              | 21.18 (-1.78, 49.49)      | 37.97 (9.24, 74.25)       | 0.584                | 32.76 (2.31, 72.28)     | 29.37 (6.48, 57.16)    | 0.901                | 31.40 (9.88, 57.12)      | 27.00 (-7.74, 74.82)       | 0.546                |
| Iron                  | -10.11 (-23.86, 6.12)     | -15.14 (-29.32, 1.87)     | 0.417                | -8.88 (-27.67, 14.79)   | -13.89 (-25.45, -0.53) | 0.625                | -12.46 (-23.56, 0.25)    | -9.50 (-32.38, 21.12)      | 0.520                |
| Cadmium               | -33.43 (-47.60, -15.42)   | 0.53 (-24.54, 33.92)      | 0.152                | -7.35 (-34.13, 30.34)   | -23.92 (-38.86, -5.32) | 0.304                | -17.54 (-32.73, 1.08)    | -22.21 (-48.89, 18.38)     | 0.533                |
| Lead                  | 6.81 (-14.20, 32.96)      | -32.59 (-47.29, -13.80)   | 0.067                | -25.97 (-44.20, -1.77)  | -6.22 (-23.33, 14.71)  | 0.378                | -12.90 (-27.30, 4.36)    | -22.48 (-47.79, 15.10)     | 0.780                |
| <b>Total power</b>    |                           |                           |                      |                         |                        |                      |                          |                            |                      |
| Titanium              | 14.31 (-2.08, 33.44)      | 35.94 (13.52, 62.79)      | 0.129                | 33.68 (9.39, 63.35)     | 19.46 (3.62, 37.73)    | 0.533                | 26.03 (10.48, 43.79)     | 19.24 (-7.02, 52.91)       | 0.823                |
| Cadmium               | -30.42 (-41.62, -17.07)   | 8.37 (-13.15, 35.22)      | 0.006                | -20.79 (-38.95, 2.77)   | -7.17 (-20.87, 8.91)   | 0.412                | -9.22 (-21.85, 5.46)     | -26.24 (-46.63, 1.94)      | 0.049                |
| Lead                  | -3.01 (-17.21, 13.64)     | -24.30 (-37.21, -8.73)    | 0.555                | -15.56 (-31.86, 4.64)   | -10.91 (-22.89, 2.94)  | 0.659                | -11.18 (-22.08, 1.24)    | -22.44 (-42.72, 5.02)      | 0.465                |

Abbreviations: SDNN, standard deviation of the normal-to-normal intervals; r-MSSD, square root of the mean squared difference between adjacent normal-to-normal intervals. Each interaction model included one metal-risk factor interaction term and covariates (age, gender, smoking status, pack-years, BMI, hypertension, diabetes, and urinary creatinine), and other metals that were included in the corresponding multiple-metal models. Interaction p-values represent the p-value for the interaction term. All stratified models were adjusted for other confounders and metals included in the corresponding multiple-metal models.

\*Non-smokers include never and ex-smokers. Data were presented as estimated percent changes in HRV parameters associated with a ten-fold increase in each urinary metal.

**Table S6.** Percent difference (95% CI) in HRV parameters according to BMI, hypertension and hyperlipidemia.

| Variable              | BMI<br>(< 25 kg/m <sup>2</sup> , n=1260) | BMI<br>(≥ 25 kg/m <sup>2</sup> , n=744) | p for<br>interaction | Subjects without<br>hypertension<br>(n=1283) | Subjects with<br>hypertension<br>(n=721) | p for<br>interaction | Subjects without<br>hyperlipidemia<br>(n=1168) | Subjects with<br>hyperlipidemia<br>(n=836) | p for<br>interaction |
|-----------------------|------------------------------------------|-----------------------------------------|----------------------|----------------------------------------------|------------------------------------------|----------------------|------------------------------------------------|--------------------------------------------|----------------------|
| <b>SDNN</b>           |                                          |                                         |                      |                                              |                                          |                      |                                                |                                            |                      |
| Titanium              | 7.48 (1.09, 14.26)                       | 4.97 (-3.28, 13.92)                     | 0.841                | 6.22 (0.07, 12.75)                           | 8.17 (-0.58, 17.70)                      | 0.833                | 2.40 (-3.97, 9.19)                             | 11.64 (3.51, 20.39)                        | 0.225                |
| Copper                | -7.58 (-14.62, 0.04)                     | -9.50 (-19.22, 1.40)                    | 0.803                | -8.76 (-15.76, -1.19)                        | -8.71 (-18.23, 1.92)                     | 0.669                | -5.24 (-12.99, 3.21)                           | -10.29 (-18.78, -0.92)                     | 0.499                |
| <b>r-MSSD</b>         |                                          |                                         |                      |                                              |                                          |                      |                                                |                                            |                      |
| Titanium              | 12.84 (4.54, 21.79)                      | 1.68 (-7.87, 12.23)                     | 0.554                | 6.11 (-1.41, 14.19)                          | 11.89 (0.82, 24.16)                      | 0.373                | 7.64 (-0.62, 16.59)                            | 7.07 (-2.42, 17.48)                        | 0.812                |
| Cadmium               | -9.74 (-17.48, -1.26)                    | -0.94 (-11.85, 11.32)                   | 0.049                | -8.56 (-16.03, -0.42)                        | 2.17 (-9.88, 15.82)                      | 0.054                | -5.22 (-13.42, 3.76)                           | -5.23 (-15.52, 6.32)                       | 0.371                |
| Lead                  | -8.15 (-14.87, -0.91)                    | -8.37 (-17.77, 2.12)                    | 0.600                | -7.05 (-13.57, -0.04)                        | -12.04 (-21.69, -1.21)                   | 0.974                | -10.25 (-17.00, -2.96)                         | -5.05 (-14.32, 5.22)                       | 0.326                |
| <b>Low frequency</b>  |                                          |                                         |                      |                                              |                                          |                      |                                                |                                            |                      |
| Titanium              | 31.87 (10.52, 57.34)                     | 11.93 (-11.73, 41.94)                   | 0.099                | 20.71 (1.63, 43.37)                          | 33.57 (4.33, 71.02)                      | 0.958                | 16.33 (-2.76, 39.18)                           | 33.17 (5.89, 67.48)                        | 0.657                |
| Arsenic               | -15.82 (-33.16, 6.01)                    | -28.06 (-50.03, 3.56)                   | 0.145                | -22.12 (-37.98, -2.21)                       | -19.23 (-44.07, 16.64)                   | 0.829                | -19.42 (-37.18, 3.37)                          | -20.92 (-42.00, 7.82)                      | 0.900                |
| Rubidium              | 28.99 (-1.35, 68.67)                     | 13.16 (-22.91, 66.11)                   | 0.183                | 24.13 (-3.65, 59.92)                         | 21.43 (-20.40, 85.22)                    | 0.655                | 25.01 (-4.60, 63.80)                           | 18.83 (-17.77, 71.73)                      | 0.944                |
| Cadmium               | -29.04 (-43.54, -10.82)                  | -0.37 (-26.51, 35.09)                   | 0.863                | -13.71 (-30.60, 7.28)                        | -25.18 (-46.33, 4.30)                    | 0.500                | -21.57 (-37.31, -1.88)                         | -11.57 (-35.11, 20.51)                     | 0.647                |
| <b>High frequency</b> |                                          |                                         |                      |                                              |                                          |                      |                                                |                                            |                      |
| Titanium              | 40.28 (15.52, 70.33)                     | 18.49 (-8.79, 53.92)                    | 0.472                | 26.64 (4.97, 52.79)                          | 38.69 (5.49, 82.34)                      | 0.905                | 25.67 (2.17, 54.57)                            | 34.11 (5.48, 70.51)                        | 0.711                |
| Iron                  | -9.31 (-22.01, 5.44)                     | -17.14 (-32.99, 2.47)                   | 0.545                | -12.66 (-24.46, 0.97)                        | -10.88 (-28.82, 11.59)                   | 0.989                | -10.47 (-23.50, 4.79)                          | -15.06 (-30.32, 3.54)                      | 0.867                |
| Cadmium               | -24.61 (-40.04, -5.20)                   | -9.85 (-33.85, 22.87)                   | 0.401                | -19.22 (-35.10, 0.54)                        | -7.11 (-33.19, 29.15)                    | 0.571                | -20.75 (-37.31, 0.19)                          | -9.67 (-32.95, 21.71)                      | 0.520                |
| Lead                  | -11.61 (-27.42, 7.65)                    | -18.48 (-39.03, 8.98)                   | 0.631                | -5.48 (-21.76, 14.20)                        | -32.36 (-50.39, -7.77)                   | 0.114                | -14.35 (-30.22, 5.13)                          | -13.08 (-33.75, 14.05)                     | 0.908                |
| <b>Total power</b>    |                                          |                                         |                      |                                              |                                          |                      |                                                |                                            |                      |
| Titanium              | 30.50 (12.76, 51.04)                     | 14.30 (-5.75, 38.60)                    | 0.398                | 18.76 (3.28, 36.56)                          | 35.77 (10.54, 66.76)                     | 0.571                | 14.79 (-1.28, 33.48)                           | 37.02 (14.09, 64.56)                       | 0.241                |
| Cadmium               | 13.42 (-27.07, 2.80)                     | -9.35 (-27.82, 13.85)                   | 0.835                | -13.14 (-26.14, 2.14)                        | -5.29 (-26.07, 21.33)                    | 0.722                | -8.46 (-22.84, 8.60)                           | -15.12 (-32.35, 6.50)                      | 0.899                |
| Lead                  | -13.85 (-25.50, -0.38)                   | -10.67 (-27.71, 10.38)                  | 0.881                | -9.54 (-21.22, 3.87)                         | -20.11 (-36.48, 0.49)                    | 0.384                | -16.25 (-27.74, -2.94)                         | -3.92 (-21.54, 17.67)                      | 0.365                |

Abbreviations: SDNN, standard deviation of the normal-to-normal intervals; r-MSSD, square root of the mean squared difference between adjacent normal-to-normal intervals. Each interaction model included one metal-risk factor interaction term and covariates (age, gender, smoking status, pack-years, BMI, hypertension, diabetes, and urinary creatinine), and other metals that were included in the corresponding multiple-metal models. Interaction p-values represent the p-value for the interaction term. All stratified models were adjusted for other confounders and metals included in the corresponding multiple-metal models. Data were presented as estimated percent changes in HRV parameters associated with a ten-fold increase in each urinary metal.

**Table S7.** Percent difference (95% CI) in HRV parameters according to diabetes and FRS.

| Variable              | Subjects without diabetes (n=1840) | Subjects with diabetes (n=164) | p for interaction | Subjects with low-risk FRS ( $\leq 5\%$ , n=960) | Subjects with high-risk FRS ( $> 5\%$ , n=835) | p for interaction |
|-----------------------|------------------------------------|--------------------------------|-------------------|--------------------------------------------------|------------------------------------------------|-------------------|
| <b>SDNN</b>           |                                    |                                |                   |                                                  |                                                |                   |
| Titanium              | 6.56 (1.36, 12.04)                 | 12.96 (-9.27, 40.63)           | 0.225             | 2.00 (-4.83, 9.32)                               | 13.79 (4.72, 23.65)                            | 0.195             |
| Copper                | -6.49 (-12.51, -0.05)              | -24.30 (-41.74, -1.63)         | 0.046             | -12.32 (-20.08, -3.82)                           | -10.43 (-19.49, -0.34)                         | 0.813             |
| <b>r-MSSD</b>         |                                    |                                |                   |                                                  |                                                |                   |
| Titanium              | 8.25 (1.65, 15.27)                 | 6.69 (-15.61, 34.88)           | 0.586             | 3.20 (-4.96, 12.05)                              | 13.65 (3.15, 25.21)                            | 0.131             |
| Cadmium               | -5.73 (-12.45, 1.50)               | -12.00 (-32.30, 14.40)         | 0.483             | -14.06 (-21.28, -6.19)                           | -0.93 (-11.50, 1.90)                           | 0.127             |
| Lead                  | -7.99 (-13.78, -1.82)              | -10.96 (-28.81, 11.36)         | 0.504             | -4.07 (-11.33, 3.79)                             | -11.59 (-20.71, -1.43)                         | 0.747             |
| <b>Low frequency</b>  |                                    |                                |                   |                                                  |                                                |                   |
| Titanium              | 19.97 (3.66, 38.84)                | 116.66 (20.43, 289.80)         | 0.271             | 26.17 (1.60, 56.69)                              | 47.69 (17.37, 85.83)                           | 0.858             |
| Arsenic               | -15.67 (-30.91, 2.93)              | -59.39 (-82.92, -3.49)         | 0.085             | -35.26 (-50.67, -15.02)                          | -39.88 (-56.98, -15.97)                        | 0.257             |
| Rubidium              | 20.33 (-3.85, 50.60)               | 36.68 (-49.11, 267.07)         | 0.536             | 51.75 (10.85, 107.74)                            | 41.59 (-3.50, 107.75)                          | 0.299             |
| Cadmium               | -17.73 (-31.78, -0.78)             | -25.52 (-64.99, 58.45)         | 0.557             | -38.81 (-52.43, -21.28)                          | -37.21 (-53.18, -15.81)                        | 0.429             |
| <b>High frequency</b> |                                    |                                |                   |                                                  |                                                |                   |
| Titanium              | 30.92 (11.33, 53.95)               | 41.45 (-21.95, 156.35)         | 0.555             | 23.44 (-1.16, 54.18)                             | 37.89 (7.60, 76.71)                            | 0.411             |
| Iron                  | -9.51 (-20.39, 2.85)               | -38.33 (-60.45, -3.83)         | 0.072             | -4.80 (-19.34, 12.37)                            | -26.94 (-41.00, -9.54)                         | 0.065             |
| Cadmium               | -19.05 (-33.15, -1.99)             | -9.23 (-53.35, 76.60)          | 0.741             | -36.06 (-49.59, -18.89)                          | -7.60 (-30.82, 23.42)                          | 0.176             |
| Lead                  | -11.48 (-25.33, 4.95)              | -33.65 (-62.98, 18.91)         | 0.120             | -3.73 (-22.55, 19.66)                            | -16.50 (37.07, 10.81)                          | 0.593             |
| <b>Total power</b>    |                                    |                                |                   |                                                  |                                                |                   |
| Titanium              | 23.77 (9.77, 39.55)                | 48.26 (-8.99, 141.52)          | 0.718             | 19.59 (1.42, 41.01)                              | 41.78 (16.60, 72.39)                           | 0.416             |
| Cadmium               | -11.54 (-23.18, 1.88)              | -25.72 (-56.97, 28.22)         | 0.843             | -28.84 (-40.30, -15.19)                          | -22.78 (-38.49, -3.05)                         | 0.937             |
| Lead                  | -12.51 (-22.72, -0.96)             | -7.99 (-42.24, 46.58)          | 0.951             | -8.37 (-21.73, 7.28)                             | -8.51 (-26.54, 13.93)                          | 0.958             |

Abbreviations: FRS, Framingham risk score; SDNN, standard deviation of the normal-to-normal intervals; r-MSSD, square root of the mean squared difference between adjacent normal-to-normal intervals. Each interaction model included one metal-risk factor interaction term and covariates (age, gender, smoking status, pack-years, BMI, hypertension, diabetes, and urinary creatinine), and other metals that were included in the corresponding multiple-metal models. Interaction p-values represent the p-value for the interaction term. All stratified models were adjusted for other confounders and metals included in the corresponding multiple-metal models. Data were presented as estimated percent changes in HRV parameters associated with a ten-fold increase in each urinary metal.



**Figure S1.** Distribution of natural log-transformed HRV parameters. Abbreviations: lnSDNN, natural log-transformed standard deviation of the normal-to-normal intervals; lnr-MSSD, natural log-transformed square root of the mean squared difference between adjacent normal-to-normal intervals; lnLF, natural log-transformed low frequency; lnHF, natural log-transformed high frequency; lnTP, natural log-transformed total power. p-values were derived from Kolmogorov-Smimov test.

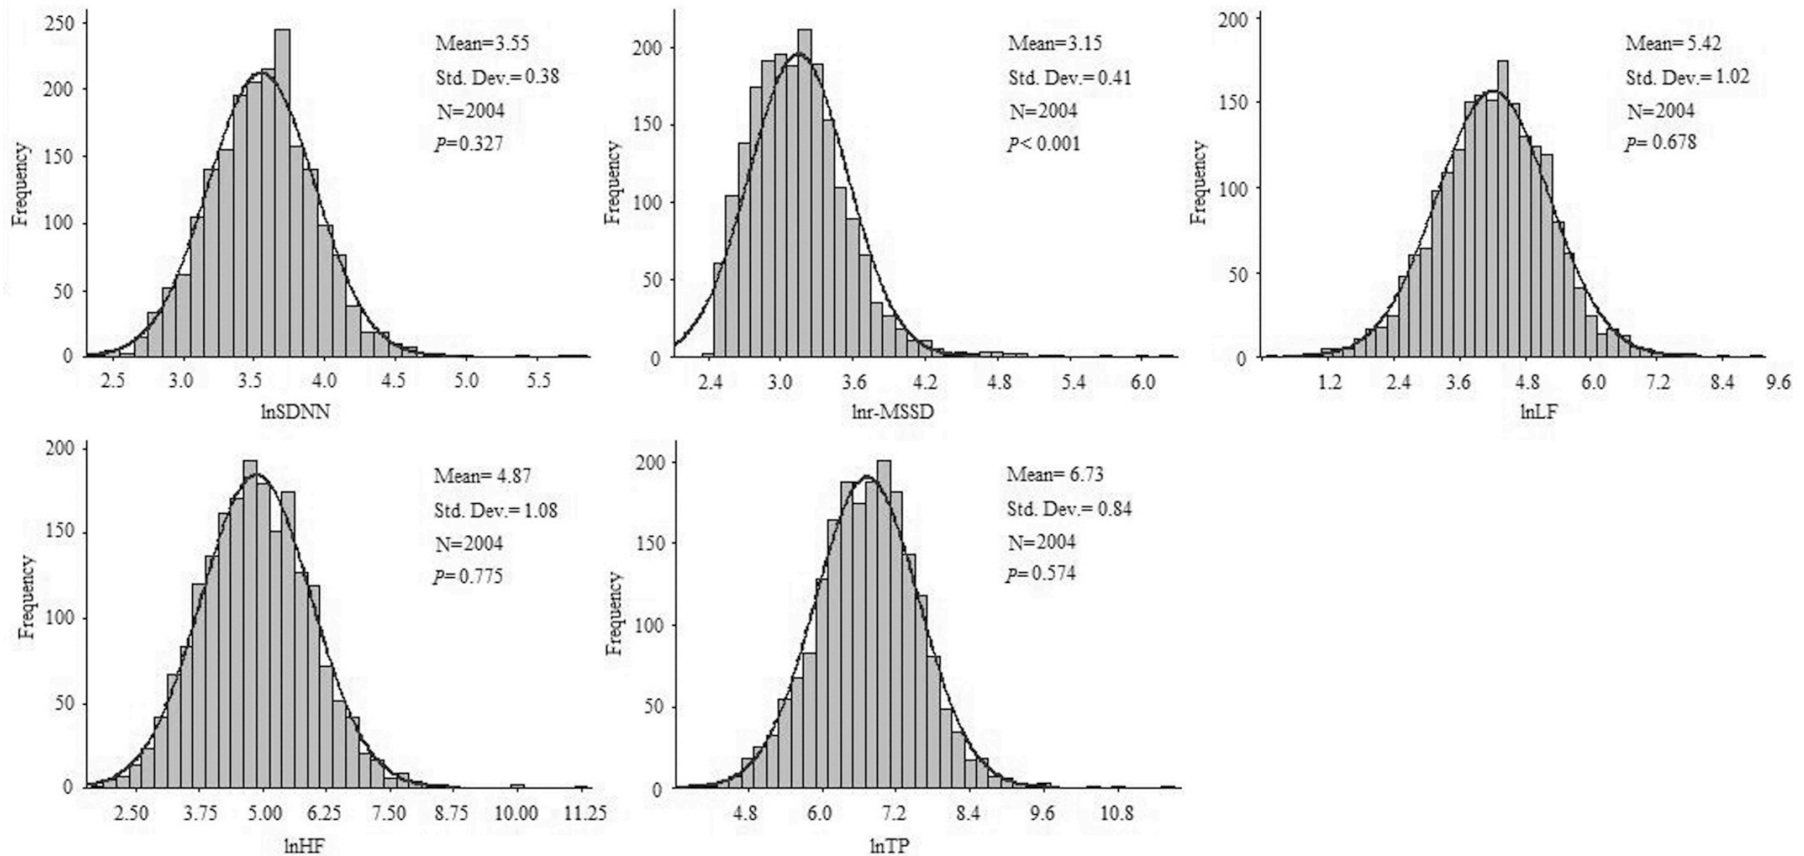

**Figure S2.** Estimated percent difference (95%CI) in HRV indices with a 10-fold increase in creatinine-standardized urine metal concentrations based on single-metal linear regression models adjusted for age, gender, smoking status, pack-years, BMI, hypertension, hyperlipidemia and diabetes. \*FDR-adjusted  $p < 0.05$ . Abbreviations: FDR, false discovery rate; SDNN, standard deviation of the normal-to-normal intervals; r-MSSD, square root of the mean squared difference between adjacent normal-to-normal intervals.

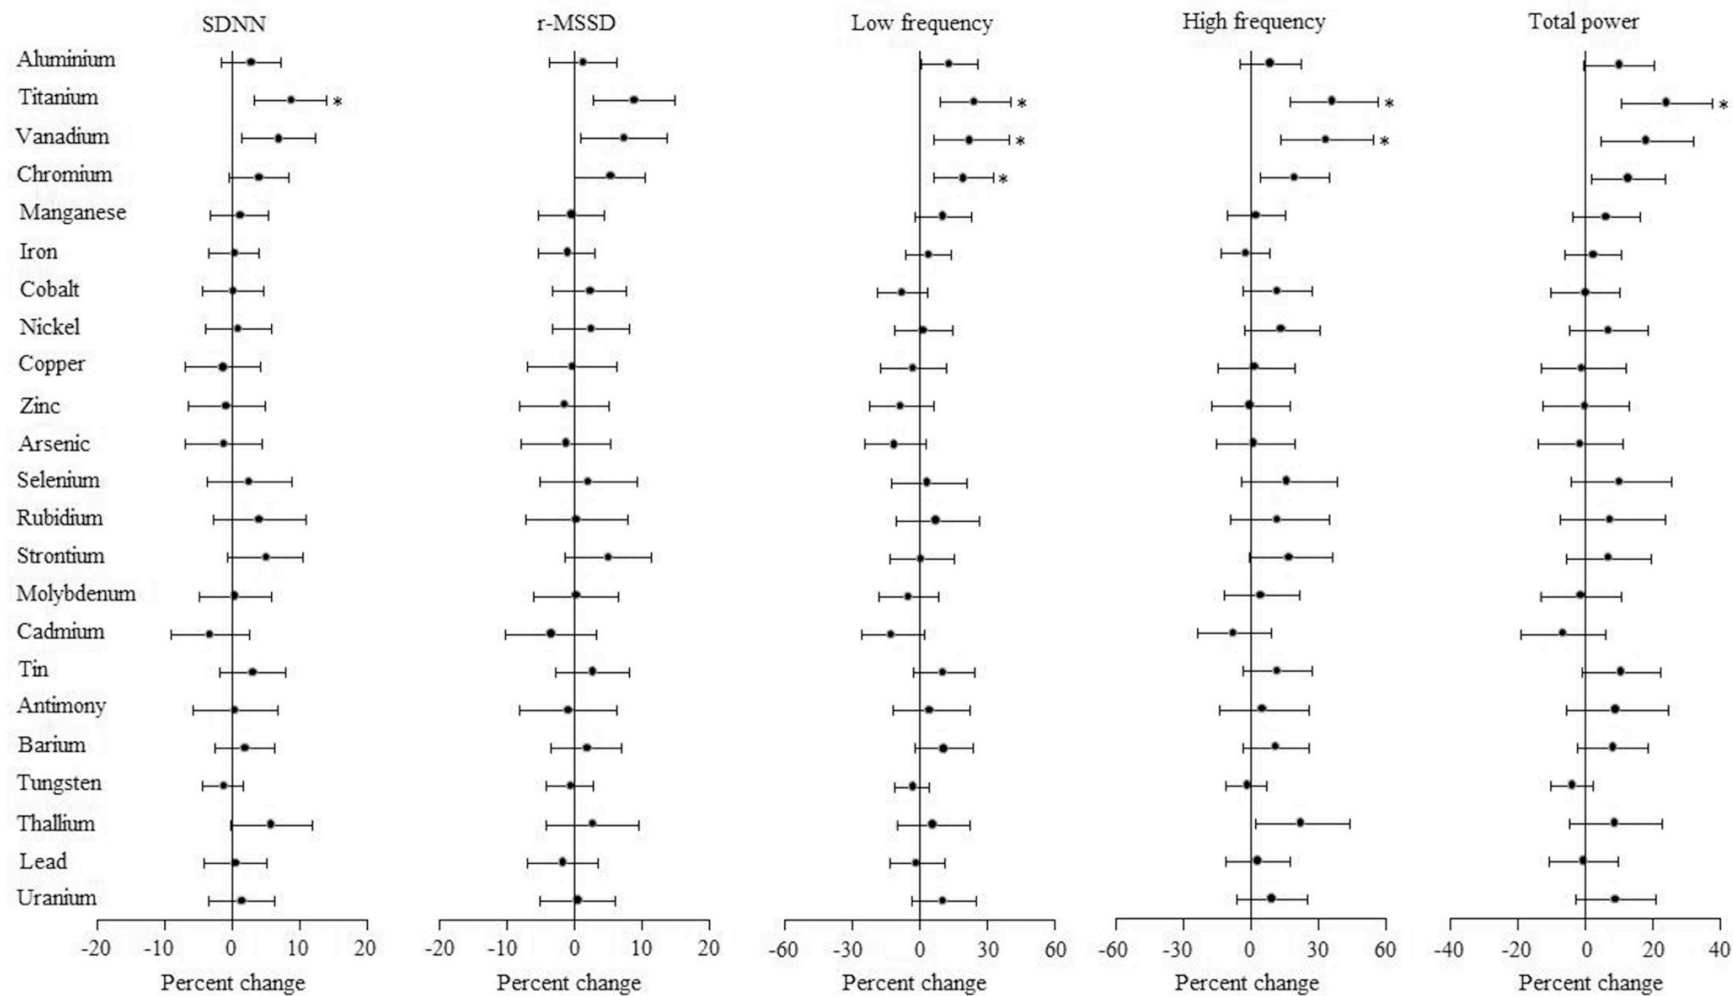

Supplement: ehp.1307563.s001.508.pdf [file ehp.1307563.s001.508.pdf]
